# Supplementary material for: Stresserleben und Stresssymptomatik von Kindern und Jugendlichen in Zeiten der COVID-19-Pandemie
Source: Atypon-hosted journal article supplement (doi:10.1026/0942-5403/a000430), 2023-12-21
Supplement: 0942-5403_a000430_esm1.pdf [file 0942-5403_a000430_esm1.pdf]

## Elektronische Supplemente (ESM)

**ESM 1.** Tabelle E1. Mittelwerte (*M*), Standardabweichungen (*SD*) und Stichprobenumfänge (*n*) zu den querschnittlichen Vergleichen von Stichprobe D (2022) mit der Normstichprobe (2018) zur Kreuzvalidierung der Ergebnisse (Analysen 2.1 und 2.2)

| Analyse 2.1<br>(Jahrgangsstufen 5-8) | Stichprobe D (2022) |           |          | Normstichprobe (2018) |           |          |
|--------------------------------------|---------------------|-----------|----------|-----------------------|-----------|----------|
|                                      | <i>M</i>            | <i>SD</i> | <i>n</i> | <i>M</i>              | <i>SD</i> | <i>n</i> |
| Stresserleben                        |                     |           |          |                       |           |          |
| Mädchen                              | 2.86                | 0.42      | 46       | 2.60                  | 0.49      | 155      |
| Jungen                               | 2.55                | 0.49      | 36       | 2.51                  | 0.47      | 143      |
| Gesamt                               | 2.72                | 0.48      | 82       | 2.56                  | 0.48      | 298      |
| Physische Stresssymptomatik          | <i>M</i>            | <i>SD</i> | <i>n</i> | <i>M</i>              | <i>SD</i> | <i>n</i> |
| Mädchen                              | 1.86                | 0.52      | 46       | 1.62                  | 0.46      | 155      |
| Jungen                               | 1.66                | 0.56      | 36       | 1.48                  | 0.39      | 143      |
| Gesamt                               | 1.77                | 0.54      | 82       | 1.55                  | 0.43      | 298      |
| Analyse 2.2<br>(Jahrgangsstufen 7-8) | Stichprobe D (2022) |           |          | Normstichprobe (2018) |           |          |
| Stresserleben                        | <i>M</i>            | <i>SD</i> | <i>n</i> | <i>M</i>              | <i>SD</i> | <i>n</i> |
| Mädchen                              | 2.93                | 0.44      | 32       | 2.52                  | 0.48      | 71       |
| Jungen                               | 2.72                | 0.41      | 19       | 2.46                  | 0.50      | 70       |
| Gesamt                               | 2.85                | 0.44      | 51       | 2.49                  | 0.49      | 141      |
| Physische Stresssymptomatik          | <i>M</i>            | <i>SD</i> | <i>n</i> | <i>M</i>              | <i>SD</i> | <i>n</i> |
| Mädchen                              | 1.93                | 0.54      | 32       | 1.67                  | 0.49      | 71       |
| Jungen                               | 1.62                | 0.60      | 19       | 1.46                  | 0.36      | 70       |
| Gesamt                               | 1.81                | 0.57      | 51       | 1.56                  | 0.44      | 141      |

**ESM 1.** Tabelle E2. Ergebnisse der MAN(C)OVAs zu den querschnittlichen Vergleichen von Stichprobe D (2022) mit der Normstichprobe (2018) zur Kreuzvalidierung der Ergebnisse (Analysen 2.1 und 2.2)

|                                      | Effekte                     | Stichprobe     |          |                  | Geschlecht     |          |                  | Stichprobe x Geschlecht |          |                  |
|--------------------------------------|-----------------------------|----------------|----------|------------------|----------------|----------|------------------|-------------------------|----------|------------------|
| Analyse 2.1<br>(Jahrgangsstufen 5-8) | <i>Multivariat</i>          | $F_{(2, 374)}$ | $\eta^2$ | Wilk's $\Lambda$ | $F_{(2, 374)}$ | $\eta^2$ | Wilk's $\Lambda$ | $F_{(2, 374)}$          | $\eta^2$ | Wilk's $\Lambda$ |
|                                      |                             | 8.45***        | .04      | .96              | 8.87***        | .05      | .96              | 1.75                    | .01      | .99              |
|                                      | <i>Univariat</i>            | $F_{(1, 375)}$ | $\eta^2$ |                  | $F_{(1, 375)}$ | $\eta^2$ |                  |                         |          |                  |
|                                      | Stresserleben               | 6.72*          | .02      |                  | 12.06***       | .03      |                  |                         |          |                  |
|                                      | Physische Stresssymptomatik | 12.82***       | .03      |                  | 8.61**         | .02      |                  |                         |          |                  |
| Analyse 2.2<br>(Jahrgangsstufen 7-8) | <i>Multivariat</i>          | $F_{(2, 344)}$ | $\eta^2$ | Wilk's $\Lambda$ | $F_{(2, 344)}$ | $\eta^2$ | Wilk's $\Lambda$ | $F_{(2, 344)}$          | $\eta^2$ | Wilk's $\Lambda$ |
|                                      |                             | 10.01***       | .06      | .95              | 5.97**         | .03      | .97              | 0.86                    | .01      | .99              |
|                                      | <i>Univariat</i>            | $F_{(1, 345)}$ | $\eta^2$ |                  | $F_{(1, 345)}$ | $\eta^2$ |                  |                         |          |                  |
|                                      | Stresserleben               | 13.56***       | .04      |                  | 4.24*          | .01      |                  |                         |          |                  |
|                                      | Physische Stresssymptomatik | 10.30**        | .03      |                  | 9.79**         | .03      |                  |                         |          |                  |

*Anmerkungen.* Univariate Effekte werden nur berichtet, wenn sich der multivariate Effekt als signifikant erwies.

\*\*\* $p < .001$ , \*\* $p < .01$ , \* $p < .05$ .
